# Supplementary material for: Randomized Trial to Assess the Clinical Utility of Renal Allograft Monitoring by Urine CXCL10 Chemokine
Source: PubMed Central journal article supplement (PMC10400101; doi:10.1681/asn.0000000000000160), 2023-05-25
Supplement: jasn-34-1456-s001.pdf [file jasn-34-1456-s001.pdf]

Manuscript ID:

## Adapted\* CONSORT Checklist for Clinical Trials

| Section/Topic                                                        | Checklist Item                                                                                                                                                                                        | Response |
|----------------------------------------------------------------------|-------------------------------------------------------------------------------------------------------------------------------------------------------------------------------------------------------|----------|
| <b>Title</b>                                                         | Identified as a randomized trial in the title.                                                                                                                                                        |          |
| <b>Background</b>                                                    | Specific objectives or hypotheses clearly stated.                                                                                                                                                     |          |
| <b>Trial Design</b>                                                  | Trial design ( <i>such as parallel, factorial</i> ) including allocation ratio.                                                                                                                       |          |
|                                                                      | Important changes to methods after trial commencement ( <i>such as eligibility criteria</i> ), with reasons.                                                                                          |          |
| <b>Participants</b>                                                  | Eligibility criteria for participants.                                                                                                                                                                |          |
|                                                                      | Settings and locations where the data were collected.                                                                                                                                                 |          |
| <b>Interventions</b>                                                 | The interventions for each group with sufficient details to allow replication, including how and when they were actually administered.                                                                |          |
| <b>Outcomes</b>                                                      | Completely defined per-specified primary and secondary outcome measures, including how and when they were assessed.                                                                                   |          |
|                                                                      | Any changes to trial outcomes after the trial commenced, with reasons.                                                                                                                                |          |
| <b>Sample Size</b>                                                   | How sample size was determined.                                                                                                                                                                       |          |
|                                                                      | Explanation of any interim analyses and stopping guidelines.                                                                                                                                          |          |
| <b>Randomization</b>                                                 |                                                                                                                                                                                                       |          |
| • <b>Sequence generation</b>                                         | Method used to generate the random allocation sequence.                                                                                                                                               |          |
|                                                                      | Type of randomization; details of any restriction ( <i>such as blocking and block size</i> ).                                                                                                         |          |
| • <b>Allocation concealment mechanism</b>                            | Mechanism used to implement the random allocation sequence ( <i>such as sequentially numbered containers</i> ), describing any steps taken to conceal the sequence until interventions were assigned. |          |
| • <b>Implementation</b>                                              | Who generated the random allocation sequence, who enrolled participants, and who assigned participants to interventions.                                                                              |          |
| <b>Blinding</b>                                                      | If done, who was blinded after assignment to interventions ( <i>for example, participants, care providers, those assessing outcomes</i> ).                                                            |          |
|                                                                      | If relevant, description of the similarity of interventions.                                                                                                                                          |          |
| <b>Statistical Methods</b>                                           | Statistical methods used to compare groups for primary and secondary outcomes.                                                                                                                        |          |
|                                                                      | Methods for additional analyses, such as subgroup analyses and adjusted analyses.                                                                                                                     |          |
| <b>Participant Flow</b> ( <i>a diagram is strongly recommended</i> ) | For each group, the numbers of participants who were randomly assigned, received intended treatment, and were analyzed for the primary outcome .                                                      |          |
|                                                                      | For each group, losses and exclusions after randomization, together with reasons.                                                                                                                     |          |
| <b>Recruitment</b>                                                   | Dates defining the periods of recruitment and follow-up.                                                                                                                                              |          |
|                                                                      | Why the trial ended or was stopped.                                                                                                                                                                   |          |
| <b>Baseline Data</b>                                                 | A table showing baseline demographic and clinical characteristics for each group.                                                                                                                     |          |
| <b>Numbers Analyzed</b>                                              | For each group, number of participants ( <i>denominator</i> ) included in each analysis and whether the analysis was by original assigned groups.                                                     |          |
| <b>Outcomes and Estimation</b>                                       | For each primary and secondary outcome, results for each group, and the estimated effect size and its precision ( <i>such as 95% confidence interval</i> ).                                           |          |
|                                                                      | For binary outcomes, presentation of both absolute and relative effect sizes.                                                                                                                         |          |
| <b>Ancillary Analyses</b>                                            | Results of any other analyses performed, including subgroup analyses and adjusted analyses, distinguishing pre-specified from exploratory.                                                            |          |
| <b>Harms</b>                                                         | All important harms or unintended effects in each group.                                                                                                                                              |          |
| <b>Data Sharing</b>                                                  | A data sharing statement is included.                                                                                                                                                                 |          |

**Additional Details:**
